# Supplementary material for: Functional Polymorphisms in Dopaminergic Genes Modulate Neurobehavioral and Neurophysiological Consequences of Sleep Deprivation
Source: PubMed Central journal article supplement (PMC5385564; doi:10.1038/srep45982), 2017-04-10
Supplement: srep45982-s1.pdf [file srep45982-s1.pdf]

**FUNCTIONAL POLYMORPHISMS IN DOPAMINERGIC GENES MODULATE NEUROBEHAVIORAL AND  
NEUROPHYSIOLOGICAL CONSEQUENCES OF SLEEP DEPRIVATION**

***Supplementary information***

Sebastian C. Holst<sup>1,2,3</sup>, Thomas Müller<sup>1</sup>, Amandine Valomon<sup>1,2,3</sup>, Britta Seebauer<sup>4,5</sup>,  
Wolfgang Berger<sup>3,4,5</sup> and Hans-Peter Landolt<sup>1,2,3</sup>

<sup>1</sup> *Institute of Pharmacology and Toxicology, University of Zürich, Zürich, Switzerland*

<sup>2</sup> *Zurich Center of Interdisciplinary Sleep Research, University of Zürich, Zürich, Switzerland*

<sup>3</sup> *Zurich Center for Integrative Human Physiology, University of Zürich, Zürich, Switzerland*

<sup>4</sup> *Institute of Medical Molecular Genetics, University of Zürich, Schlieren, Switzerland*

<sup>5</sup> *Zurich Center of Neuroscience (ZNZ), University of Zurich and Federal Institute of Technology (ETH)  
Zurich, Zurich, Switzerland*

Abbreviated title: *Dopaminergic polymorphisms and human sleep loss*

Submitted to: **Scientific Reports**  
February 20, 2017

Supplementary figure 1.

**A**

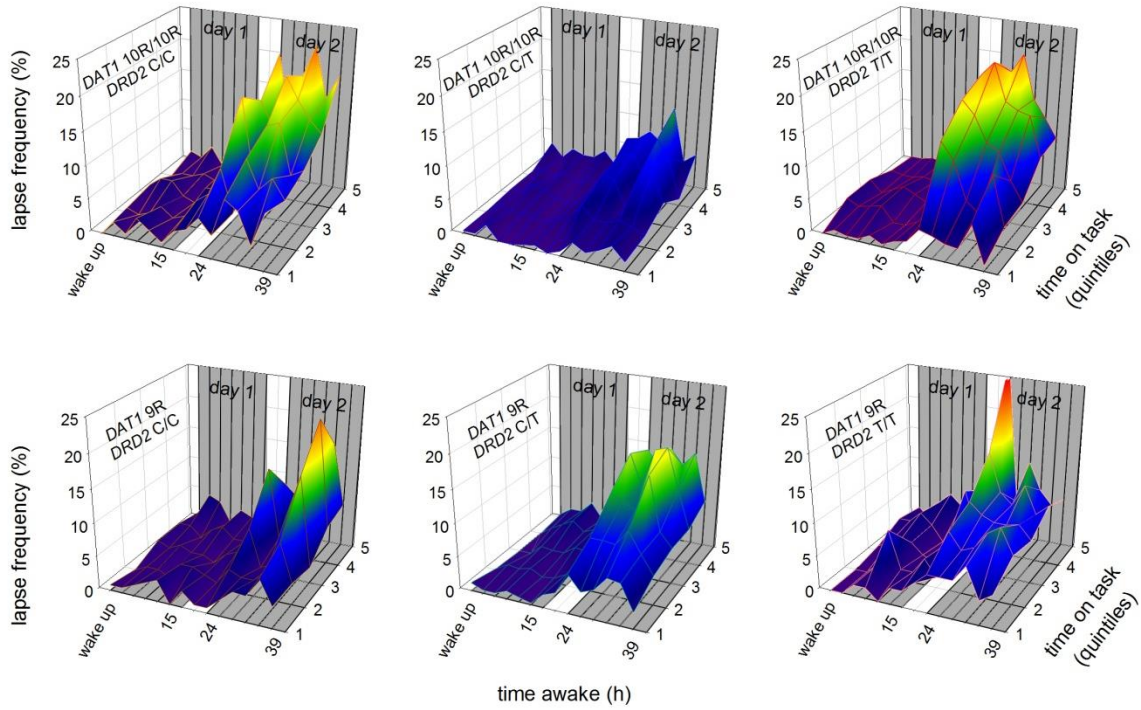

**B**

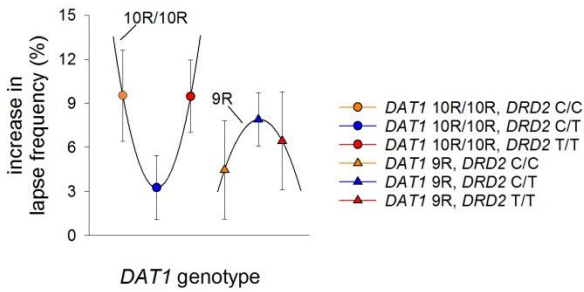

Illustration of the PVT lapse frequency data included in statistical models. **A**: PVT attention lapses (y-axis) as a function of time-on-task (z-axis) and time awake (x-axis). Warmer colors refers to higher lapse frequency. **B**: The relative increase in PVT lapse frequency from baseline to the sleep deprived day split by the six *DAT1-DRD2* genotypes plotted on a U-shaped curve. The figure resembles the reported increase in subjective sleepiness (Fig. 2C).

Supplementary table 1. Results of all genotype independent ANOVAs.

|                                          |                     | F <sub>value</sub>           | p <sub>value</sub>   |
|------------------------------------------|---------------------|------------------------------|----------------------|
| PVT lapses                               | Session             | F <sub>5,544</sub> = 9.41    | 1.31E <sup>-08</sup> |
|                                          | ToT                 | F <sub>4,520</sub> = 34.92   | 7.68E <sup>-26</sup> |
|                                          | Day                 | F <sub>1,1183</sub> = 536.60 | 3.44E <sup>-98</sup> |
|                                          | Session x ToT       | F <sub>20,279</sub> = 0.70   | 0.83                 |
|                                          | Session x Day       | F <sub>5,544</sub> = 9.87    | 4.82E <sup>-09</sup> |
|                                          | ToT x Day           | F <sub>4,520</sub> = 24.19   | 2.26E <sup>-18</sup> |
|                                          | Session x ToT x Day | F <sub>20,279</sub> = 1.16   | 0.29                 |
| PVT standard deviation                   | Session             | F <sub>5,734</sub> = 6.89    | 2.70E <sup>-06</sup> |
|                                          | ToT                 | F <sub>4,845</sub> = 2.31    | 5.61E <sup>-02</sup> |
|                                          | Day                 | F <sub>1,2122</sub> = 259.21 | 4.10E <sup>-55</sup> |
|                                          | Session x ToT       | F <sub>20,390</sub> = 0.81   | 0.71                 |
|                                          | Session x Day       | F <sub>5,734</sub> = 2.50    | 2.96E <sup>-02</sup> |
|                                          | ToT x Day           | F <sub>4,845</sub> = 0.87    | 0.48                 |
|                                          | Session x ToT x Day | F <sub>20,390</sub> = 1.12   | 0.33                 |
| Subjective sleepiness                    | Session             | F <sub>5,567</sub> = 17.73   | 2.44E <sup>-16</sup> |
|                                          | Day                 | F <sub>1,218</sub> = 920.00  | 3.58E <sup>-80</sup> |
|                                          | Session x Day       | F <sub>5,555</sub> = 3.41    | 4.85E <sup>-03</sup> |
| Waking EEG – Delta band<br>1 - 4.5 Hz    | Session             | F <sub>5,619</sub> = 7.02    | 2.17E <sup>-06</sup> |
|                                          | Day                 | F <sub>1,213</sub> = 108.81  | 7.67E <sup>-21</sup> |
|                                          | Session x Day       | F <sub>5,573</sub> = 4.99    | 1.75E <sup>-04</sup> |
| Waking EEG – Theta band<br>5 – 7.5 Hz    | Session             | F <sub>5,626</sub> = 8.26    | 1.44E <sup>-07</sup> |
|                                          | Day                 | F <sub>1,193</sub> = 233.57  | 4.56E <sup>-35</sup> |
|                                          | Session x Day       | F <sub>5,566</sub> = 9.14    | 2.22E <sup>-08</sup> |
| Waking EEG – Alpha band<br>8 – 11.5 Hz   | Session             | F <sub>5,649</sub> = 9.33    | 1.36E <sup>-08</sup> |
|                                          | Day                 | F <sub>1,169</sub> = 1.81    | 0.18                 |
|                                          | Session x Day       | F <sub>5,569</sub> = 5.87    | 2.69E <sup>-05</sup> |
| Waking EEG – Theta/Alpha ratio           | Session             | F <sub>5,636</sub> = 2.14    | 5.88E <sup>-02</sup> |
|                                          | Day                 | F <sub>1,164</sub> = 177.14  | 6.81E <sup>-28</sup> |
|                                          | Session x Day       | F <sub>5,556</sub> = 1.71    | 0.13                 |
| Waking EEG – low Beta band<br>12-19.5 Hz | Session             | F <sub>5,598</sub> = 13.65   | 1.24E <sup>-12</sup> |
|                                          | Day                 | F <sub>1,207</sub> = 24.62   | 1.45E <sup>-06</sup> |
|                                          | Session x Day       | F <sub>5,556</sub> = 20.72   | 5.27E <sup>-19</sup> |
| Waking EEG – high Beta band<br>20-30 Hz  | Session             | F <sub>5,590</sub> = 3.46    | 4.34E <sup>-03</sup> |
|                                          | Day                 | F <sub>1,182</sub> = 5.66    | 1.84E <sup>-02</sup> |
|                                          | Session x Day       | F <sub>5,537</sub> = 6.77    | 3.91E <sup>-06</sup> |

Subscript F values represent numerator and denominator degrees of freedom, respectively. Red values are below the standard 5% alpha criteria.

Supplementary table 2. Overview and results of all genotype related ANOVAs performed.

|                               |                          | DAT1                  |               |                     | DRD2                  |               |                      | DAT1-DRD2             |               |               |
|-------------------------------|--------------------------|-----------------------|---------------|---------------------|-----------------------|---------------|----------------------|-----------------------|---------------|---------------|
|                               |                          | F-value               | p-value       | q-value             | F-value               | p-value       | q-value              | F-value               | p-value       | q-value       |
| <b>PVT lapses</b>             | Genotype                 | $F_{1,134} = 1.00$    | 0.32          | 0.57                | $F_{2,135} = 2.20$    | 0.14          | 0.24                 | $F_{5,128} = 4.75$    | $5.14E^{-4}$  | $1.82E^{-3}$  |
|                               | Session                  | $F_{5,533} = 9.32$    | $1.61E^{-08}$ | $1.06E^{-07}$       | $F_{5,508} = 7.61$    | $6.64E^{-07}$ | $3.74E^{-06}$        | $F_{5,509} = 6.59$    | $5.84E^{-6}$  | $2.61E^{-5}$  |
|                               | ToT                      | $F_{4,509} = 34.44$   | $1.86E^{-25}$ | $2.75E^{-24}$       | $F_{4,503} = 30.79$   | $6.01E^{-23}$ | $8.38E^{-22}$        | $F_{4,451} = 25.95$   | $2.22E^{-19}$ | $2.75E^{-18}$ |
|                               | Day                      | $F_{1,1154} = 530.44$ | $7.17E^{-97}$ | $1.70E^{-94}$       | $F_{1,1141} = 502.83$ | $1.46E^{-92}$ | $1.73E^{-90}$        | $F_{1,1024} = 432.91$ | $1.82E^{-80}$ | $1.44E^{-78}$ |
|                               | Genotype x Session       | $F_{5,533} = 0.48$    | 0.79          | 0.91                | $F_{10,510} = 2.10$   | $2.32E^{-02}$ | $6.10E^{-02}$        | $F_{25,531} = 1.85$   | $7.54E^{-3}$  | $2.29E^{-2}$  |
|                               | Genotype x ToT           | $F_{4,509} = 0.23$    | 0.92          | 0.98                | $F_{8,500} = 0.65$    | 0.73          | 0.91                 | $F_{20,452} = 0.76$   | 0.76          | 0.91          |
|                               | Genotype x Day           | $F_{1,1154} = 0.57$   | 0.45          | 0.71                | $F_{2,1135} = 4.82$   | $8.23E^{-03}$ | $2.44E^{-02}$        | $F_{1,1023} = 12.01$  | $2.55E^{-11}$ | $1.95E^{-10}$ |
|                               | Session x ToT            | $F_{20,271} = 0.69$   | 0.84          | 0.94                | $F_{20,265} = 0.77$   | 0.75          | 0.91                 | $F_{20,254} = 0.76$   | 0.76          | 0.91          |
|                               | Session x Day            | $F_{5,533} = 9.76$    | $6.17E^{-09}$ | $4.30E^{-08}$       | $F_{5,508} = 7.60$    | $6.79E^{-07}$ | $3.74E^{-06}$        | $F_{5,509} = 6.27$    | $1.17E^{-5}$  | $5.03E^{-5}$  |
|                               | ToT x Day                | $F_{4,509} = 23.84$   | $4.31E^{-18}$ | $4.44E^{-17}$       | $F_{4,503} = 23.60$   | $6.66E^{-18}$ | $6.58E^{-17}$        | $F_{4,451} = 19.04$   | $1.75E^{-14}$ | $1.49E^{-13}$ |
|                               | Genotype x ToT x Day     | $F_{4,509} = 0.42$    | 0.80          | 0.91                | $F_{8,500} = 0.59$    | 0.79          | 0.91                 | $F_{20,452} = 0.87$   | 0.63          | 0.86          |
|                               | Genotype x Session x Day | $F_{5,533} = 0.32$    | 0.90          | 0.97                | $F_{10,510} = 2.06$   | $2.59E^{-02}$ | $6.74E^{-02}$        | $F_{25,531} = 1.85$   | $7.75E^{-3}$  | $2.33E^{-2}$  |
|                               | Genotype x Session x ToT | $F_{20,271} = 0.32$   | 1.00          | 1.00                | $F_{40,267} = 0.38$   | 1.00          | 1.00                 | $F_{100,271} = 0.36$  | 1.00          | 1.00          |
|                               | Session x ToT x Day      | $F_{20,271} = 1.14$   | 0.31          | 0.56                | $F_{20,265} = 1.06$   | 0.40          | 0.66                 | $F_{20,254} = 0.90$   | 0.59          | 0.81          |
| Quadrupled interaction        | $F_{20,271} = 0.35$      | 1.00                  | 1.00          | $F_{40,267} = 0.41$ | 0.99                  | 1.00          | $F_{100,271} = 0.39$ | 1.00                  | 1.00          |               |
|                               |                          |                       |               |                     |                       |               |                      |                       |               |               |
| <b>PVT Standard deviation</b> | Genotype                 | $F_{1,63} = 0.64$     | 0.43          | 0.69                | $F_{2,62} = 0.08$     | 0.92          | 0.98                 | $F_{5,59} = 0.50$     | 0.78          | 0.91          |
|                               | Session                  | $F_{5,713} = 6.90$    | $2.68E^{-06}$ | $1.32E^{-05}$       | $F_{5,727} = 8.17$    | $1.62E^{-07}$ | $9.86E^{-07}$        | $F_{5,649} = 7.03$    | $2.05E^{-06}$ | $1.06E^{-05}$ |
|                               | ToT                      | $F_{4,826} = 2.27$    | $6.00E^{-02}$ | 0.14                | $F_{4,851} = 2.24$    | $6.29E^{-02}$ | 0.14                 | $F_{4,770} = 2.31$    | $5.61E^{-02}$ | 0.13          |
|                               | Day                      | $F_{1,2080} = 258.25$ | $7.21E^{-55}$ | $2.44E^{-53}$       | $F_{1,2122} = 233.64$ | $4.05E^{-50}$ | $1.20E^{-48}$        | $F_{1,1971} = 219.79$ | $3.20E^{-47}$ | $8.41E^{-46}$ |
|                               | Genotype x Session       | $F_{5,713} = 2.16$    | $5.68E^{-02}$ | 0.14                | $F_{10,724} = 1.77$   | $6.29E^{-02}$ | 0.14                 | $F_{25,669} = 1.72$   | $1.69E^{-02}$ | $4.70E^{-2}$  |
|                               | Genotype x ToT           | $F_{4,826} = 0.95$    | 0.44          | 0.70                | $F_{8,845} = 0.18$    | 0.99          | 1.00                 | $F_{20,769} = 0.55$   | 0.94          | 0.99          |
|                               | Genotype x Day           | $F_{1,2080} = 0.37$   | 0.54          | 0.78                | $F_{2,2106} = 0.74$   | 0.48          | 0.74                 | $F_{5,1965} = 0.77$   | 0.57          | 0.80          |
|                               | Session x ToT            | $F_{20,397} = 0.81$   | 0.71          | 0.90                | $F_{20,379} = 0.83$   | 0.68          | 0.88                 | $F_{20,441} = 0.76$   | 0.76          | 0.91          |
|                               | Session x Day            | $F_{5,713} = 2.47$    | $3.14E^{-02}$ | $7.99E^{-02}$       | $F_{5,727} = 1.96$    | $8.30E^{-02}$ | 0.19                 | $F_{5,649} = 2.15$    | $5.78E^{-02}$ | 0.14          |
|                               | ToT x Day                | $F_{4,826} = 0.86$    | 0.49          | 0.74                | $F_{4,851} = 0.73$    | 0.58          | 0.80                 | $F_{4,770} = 0.53$    | 0.72          | 0.90          |
|                               | Genotype x ToT x Day     | $F_{4,826} = 1.96$    | $9.85E^{-02}$ | 0.22                | $F_{8,845} = 1.43$    | 0.18          | 0.37                 | $F_{20,769} = 1.18$   | 0.27          | 0.49          |
|                               | Genotype x Session x Day | $F_{5,713} = 2.87$    | $1.41E^{-02}$ | $3.99E^{-02}$       | $F_{10,724} = 1.61$   | $9.88E^{-02}$ | 0.22                 | $F_{25,669} = 1.91$   | $5.15E^{-03}$ | $1.61E^{-2}$  |
|                               | Genotype x Session x ToT | $F_{20,397} = 0.70$   | 0.83          | 0.94                | $F_{40,387} = 1.00$   | 0.47          | 0.73                 | $F_{100,436} = 1.07$  | 0.32          | 0.57          |
|                               | Session x ToT x Day      | $F_{20,397} = 1.11$   | 0.33          | 0.58                | $F_{20,379} = 1.23$   | 0.22          | 0.44                 | $F_{20,414} = 1.22$   | 0.23          | 0.44          |
| Quadrupled interaction        | $F_{20,397} = 0.580$     | 0.93                  | 0.98          | $F_{40,387} = 1.17$ | 0.23                  | 0.44          | $F_{100,436} = 0.94$ | 0.65                  | 0.86          |               |
|                               |                          |                       |               |                     |                       |               |                      |                       |               |               |
| <b>Subjective sleepiness</b>  | Genotype                 | $F_{1,80} = 0.59$     | 0.45          | 0.70                | $F_{2,78} = 0.73$     | 0.49          | 0.74                 | $F_{5,74} = 1.45$     | 0.22          | 0.42          |
|                               | Session                  | $F_{5,553} = 17.24$   | $7.24E^{-16}$ | $6.60E^{-15}$       | $F_{5,439} = 5.22$    | $4.08E^{-04}$ | $1.46E^{-03}$        | $F_{5,507} = 15.75$   | $1.99E^{-14}$ | $1.63E^{-13}$ |

|                                          |                          |                      |               |               |                      |               |               |                      |               |               |
|------------------------------------------|--------------------------|----------------------|---------------|---------------|----------------------|---------------|---------------|----------------------|---------------|---------------|
|                                          | Day                      | $F_{1,213} = 884.54$ | $9.42E^{-78}$ | $5.58E^{-76}$ | $F_{1,161} = 587.12$ | $1.66E^{-55}$ | $6.55E^{-54}$ | $F_{1,201} = 756.34$ | $5.35E^{-70}$ | $2.54E^{-68}$ |
|                                          | Genotype x Session       | $F_{5,553} = 0.32$   | 0.90          | 0.97          | $F_{10,439} = 0.63$  | 0.75          | 0.91          | $F_{25,508} = 0.58$  | 0.95          | 1.00          |
|                                          | Genotype x Day           | $F_{1,213} = 0.47$   | 0.49          | 0.74          | $F_{2,161} = 0.63$   | 0.88          | 0.97          | $F_{5,201} = 3.51$   | $4.59E^{-03}$ | $1.45E^{-02}$ |
|                                          | Session x Day            | $F_{5,541} = 3.29$   | $6.12E^{-03}$ | $1.88E^{-02}$ | $F_{5,453} = 3.04$   | $1.71E^{-02}$ | $4.72E^{-02}$ | $F_{5,502} = 2.52$   | $2.87E^{-02}$ | $7.39E^{-02}$ |
|                                          | Genotype x Session x Day | $F_{5,541} = 0.16$   | 0.98          | 1.00          | $F_{10,454} = 0.44$  | 0.90          | 0.97          | $F_{25,502} = 0.48$  | 0.99          | 1.00          |
|                                          |                          |                      |               |               |                      |               |               |                      |               |               |
| <b>Waking EEG Delta band 1 – 4.5 Hz</b>  | Genotype                 | $F_{1,79} = 0.60$    | 0.44          | 0.70          | $F_{2,77} = 1.24$    | 0.30          | 0.54          | $F_{5,74} = 0.64$    | 0.67          | 0.88          |
|                                          | Day                      | $F_{1,209} = 108.42$ | $1.01E^{-20}$ | $1.33E^{-19}$ | $F_{1,201} = 98.40$  | $3.88E^{-19}$ | $4.38E^{-18}$ | $F_{1,193} = 100.88$ | $2.32E^{-19}$ | $2.75E^{-18}$ |
|                                          | Session                  | $F_{5,612} = 7.08$   | $1.90E^{-06}$ | $1.00E^{-05}$ | $F_{5,592} = 6.03$   | $1.85E^{-05}$ | $7.54E^{-05}$ | $F_{5,568} = 6.08$   | $1.68E^{-05}$ | $6.98E^{-05}$ |
|                                          | Genotype x Day           | $F_{1,209} = 0.13$   | 0.72          | 0.90          | $F_{2,202} = 0.34$   | 0.71          | 0.90          | $F_{5,193} = 0.85$   | 0.52          | 0.75          |
|                                          | Genotype x Session       | $F_{5,612} = 1.00$   | 0.42          | 0.69          | $F_{10,593} = 1.09$  | 0.37          | 0.63          | $F_{25,573} = 0.97$  | 0.50          | 0.75          |
|                                          | Session x Day            | $F_{5,565} = 5.03$   | $1.61E^{-04}$ | $6.06E^{-04}$ | $F_{5,547} = 4.21$   | $9.23E^{-04}$ | $3.17E^{-03}$ | $F_{5,525} = 4.47$   | $5.31E^{-04}$ | $1.85E^{-03}$ |
|                                          | Genotype x Session x Day | $F_{5,565} = 1.45$   | 0.21          | 0.41          | $F_{10,547} = 0.54$  | 0.86          | 0.96          | $F_{25,539} = 0.80$  | 0.75          | 0.91          |
|                                          |                          |                      |               |               |                      |               |               |                      |               |               |
| <b>Waking EEG Theta band 5 – 7.5 Hz</b>  | Genotype                 | $F_{1,79} = 0.04$    | 0.85          | 0.95          | $F_{2,77} = 2.24$    | 0.11          | 0.24          | $F_{5,74} = 1.20$    | 0.32          | 0.57          |
|                                          | Day                      | $F_{1,191} = 233.03$ | $6.26E^{-35}$ | $1.48E^{-33}$ | $F_{1,185} = 211.86$ | $1.69E^{-32}$ | $3.33E^{-31}$ | $F_{1,180} = 221.20$ | $3.95E^{-33}$ | $8.51E^{-32}$ |
|                                          | Session                  | $F_{5,619} = 8.26$   | $1.46E^{-07}$ | $9.08E^{-07}$ | $F_{5,601} = 6.51$   | $6.54E^{-06}$ | $2.87E^{-05}$ | $F_{5,575} = 6.08$   | $1.67E^{-05}$ | $6.98E^{-05}$ |
|                                          | Genotype x Day           | $F_{1,191} = 0.18$   | 0.68          | 0.88          | $F_{2,186} = 1.13$   | 0.33          | 0.57          | $F_{5,180} = 1.96$   | $8.68E^{-02}$ | 0.19          |
|                                          | Genotype x Session       | $F_{5,619} = 0.33$   | 0.90          | 0.97          | $F_{10,602} = 0.88$  | 0.56          | 0.80          | $F_{25,577} = 0.88$  | 0.64          | 0.86          |
|                                          | Session x Day            | $F_{5,559} = 9.17$   | $2.15E^{-08}$ | $1.38E^{-07}$ | $F_{5,543} = 6.89$   | $3.01E^{-06}$ | $1.49E^{-05}$ | $F_{5,521} = 6.77$   | $3.95E^{-06}$ | $1.87E^{-05}$ |
|                                          | Genotype x Session x Day | $F_{5,559} = 0.91$   | 0.47          | 0.73          | $F_{10,544} = 1.35$  | 0.20          | 0.40          | $F_{25,523} = 1.09$  | 0.35          | 0.60          |
|                                          |                          |                      |               |               |                      |               |               |                      |               |               |
| <b>Waking EEG Alpha band 8 – 11.5 Hz</b> | Genotype                 | $F_{1,79} = 0.00$    | 0.97          | 1.00          | $F_{2,77} = 1.05$    | 0.36          | 0.61          | $F_{5,74} = 0.79$    | 0.56          | 0.80          |
|                                          | Day                      | $F_{1,171} = 2.06$   | 0.15          | 0.32          | $F_{1,163} = 5.45$   | $2.08E^{-02}$ | $5.53E^{-02}$ | $F_{1,162} = 4.42$   | $3.71E^{-02}$ | $9.26E^{-02}$ |
|                                          | Session                  | $F_{5,638} = 9.39$   | $1.19E^{-08}$ | $8.09E^{-08}$ | $F_{5,622} = 7.96$   | $2.78E^{-07}$ | $1.65E^{-06}$ | $F_{5,594} = 7.86$   | $3.52E^{-07}$ | $2.03E^{-06}$ |
|                                          | Genotype x Day           | $F_{1,171} = 10.65$  | $1.33E^{-03}$ | $4.49E^{-03}$ | $F_{2,164} = 3.01$   | $5.20E^{-02}$ | 0.13          | $F_{5,162} = 3.97$   | $2.02E^{-03}$ | $6.75E^{-03}$ |
|                                          | Genotype x Session       | $F_{5,638} = 0.62$   | 0.69          | 0.89          | $F_{10,622} = 0.66$  | 0.77          | 0.91          | $F_{25,601} = 0.76$  | 0.79          | 0.91          |
|                                          | Session x Day            | $F_{5,561} = 5.97$   | $2.15E^{-05}$ | $8.62E^{-05}$ | $F_{5,546} = 5.40$   | $7.33E^{-05}$ | $2.85E^{-04}$ | $F_{5,524} = 4.88$   | $2.26E^{-04}$ | $8.37E^{-04}$ |
|                                          | Genotype x Session x Day | $F_{5,561} = 0.59$   | 0.71          | 0.90          | $F_{10,546} = 0.76$  | 0.67          | 0.88          | $F_{25,528} = 0.75$  | 0.81          | 0.92          |
|                                          |                          |                      |               |               |                      |               |               |                      |               |               |
| <b>Waking EEG Theta/Alpha ratio</b>      | Genotype                 | $F_{1,79} = 0.02$    | 0.89          | 0.97          | $F_{2,77} = 0.54$    | 0.59          | 0.81          | $F_{5,74} = 0.78$    | 0.57          | 0.80          |
|                                          | Day                      | $F_{1,166} = 187.57$ | $4.47E^{-29}$ | $7.06E^{-28}$ | $F_{1,160} = 196.91$ | $1.10E^{-29}$ | $1.85E^{-28}$ | $F_{1,158} = 202.13$ | $4.62E^{-30}$ | $8.42E^{-29}$ |
|                                          | Session                  | $F_{5,629} = 2.19$   | $5.36E^{-02}$ | 0.13          | $F_{5,608} = 1.85$   | 0.10          | 0.22          | $F_{5,580} = 1.79$   | 0.11          | 0.24          |
|                                          | Genotype x Day           | $F_{1,166} = 8.58$   | $3.88E^{-03}$ | $1.26E^{-02}$ | $F_{2,160} = 6.14$   | $2.69E^{-03}$ | $8.85E^{-03}$ | $F_{5,158} = 5.03$   | $2.62E^{-04}$ | $9.55E^{-04}$ |
|                                          | Genotype x Session       | $F_{5,626} = 0.74$   | 0.59          | 0.81          | $F_{10,609} = 1.97$  | $3.45E^{-02}$ | $8.70E^{-02}$ | $F_{25,584} = 1.17$  | 0.26          | 0.48          |
|                                          | Session x Day            | $F_{5,549} = 1.72$   | 0.13          | 0.27          | $F_{5,533} = 2.26$   | $4.76E^{-02}$ | 0.12          | $F_{5,512} = 1.79$   | 0.11          | 0.24          |
|                                          | Genotype x Session x Day | $F_{5,549} = 0.45$   | 0.81          | 0.92          | $F_{10,533} = 1.34$  | 0.21          | 0.41          | $F_{5,515} = 1.07$   | 0.38          | 0.64          |
|                                          |                          |                      |               |               |                      |               |               |                      |               |               |
| <b>Waking EEG Low Beta 12 – 19.5 Hz</b>  | Genotype                 | $F_{1,79} = 0.43$    | 0.51          | 0.75          | $F_{2,77} = 0.57$    | 0.57          | 0.80          | $F_{5,74} = 0.88$    | 0.50          | 0.75          |
|                                          | Day                      | $F_{1,205} = 24.43$  | $1.60E^{-06}$ | $8.61E^{-06}$ | $F_{1,198} = 22.37$  | $4.26E^{-06}$ | $1.98E^{-05}$ | $F_{1,191} = 22.72$  | $3.69E^{-06}$ | $1.79E^{-05}$ |
|                                          | Session                  | $F_{5,590} = 13.63$  | $1.33E^{-12}$ | $1.05E^{-11}$ | $F_{5,573} = 11.60$  | $1.09E^{-10}$ | $8.06E^{-10}$ | $F_{5,552} = 10.50$  | $1.21E^{-09}$ | $8.70E^{-09}$ |

|                                        |                          |                     |                      |                      |                     |                      |                      |                     |                      |                      |
|----------------------------------------|--------------------------|---------------------|----------------------|----------------------|---------------------|----------------------|----------------------|---------------------|----------------------|----------------------|
|                                        | Genotype x Day           | $F_{1,205} = 1.77$  | 0.19                 | 0.38                 | $F_{2,199} = 0.68$  | 0.51                 | 0.75                 | $F_{5,192} = 0.87$  | 0.50                 | 0.75                 |
|                                        | Genotype x Session       | $F_{5,590} = 1.18$  | 0.32                 | 0.57                 | $F_{10,574} = 0.68$ | 0.74                 | 0.91                 | $F_{25,557} = 0.80$ | 0.74                 | 0.91                 |
|                                        | Session x Day            | $F_{5,549} = 20.74$ | 5.26E <sup>-19</sup> | 5.67E <sup>-18</sup> | $F_{5,533} = 17.42$ | 5.50E <sup>-16</sup> | 5.21E <sup>-15</sup> | $F_{5,513} = 17.09$ | 1.20E <sup>-15</sup> | 1.05E <sup>-14</sup> |
|                                        | Genotype x Session x Day | $F_{5,549} = 0.65$  | 0.66                 | 0.88                 | $F_{10,534} = 0.51$ | 0.88                 | 0.97                 | $F_{25,517} = 0.49$ | 0.98                 | 1.00                 |
| <b>Waking EEG High Beta 20 – 30 Hz</b> | Genotype                 | $F_{1,79} = 0.61$   | 0.44                 | 0.70                 | $F_{2,77} = 0.44$   | 0.65                 | 0.86                 | $F_{5,74} = 1.04$   | 0.40                 | 0.66                 |
|                                        | Day                      | $F_{1,178} = 5.65$  | 1.85E <sup>-02</sup> | 4.98E <sup>-02</sup> | $F_{1,172} = 6.88$  | 9.49E <sup>-03</sup> | 2.78E <sup>-02</sup> | $F_{1,165} = 6.57$  | 1.13E <sup>-02</sup> | 3.25E <sup>-02</sup> |
|                                        | Session                  | $F_{5,582} = 3.43$  | 4.58E <sup>-03</sup> | 1.45E <sup>-02</sup> | $F_{5,568} = 2.94$  | 1.25E <sup>-02</sup> | 3.56E <sup>-02</sup> | $F_{5,547} = 2.76$  | 1.79E <sup>-02</sup> | 4.87E <sup>-02</sup> |
|                                        | Genotype x Day           | $F_{1,178} = 0.79$  | 0.38                 | 0.64                 | $F_{2,172} = 0.90$  | 0.41                 | 0.67                 | $F_{5,154} = 0.47$  | 0.80                 | 0.91                 |
|                                        | Genotype x Session       | $F_{5,582} = 0.32$  | 0.90                 | 0.97                 | $F_{10,569} = 1.20$ | 0.29                 | 0.54                 | $F_{25,551} = 0.78$ | 0.78                 | 0.91                 |
|                                        | Session x Day            | $F_{5,529} = 6.69$  | 4.64E <sup>-06</sup> | 2.11E <sup>-05</sup> | $F_{5,515} = 5.74$  | 3.65E <sup>-05</sup> | 1.44E <sup>-04</sup> | $F_{5,495} = 5.23$  | 1.08E <sup>-04</sup> | 4.13E <sup>-04</sup> |
|                                        | Genotype x Session x Day | $F_{5,529} = 0.53$  | 0.76                 | 0.91                 | $F_{10,516} = 1.29$ | 0.23                 | 0.44                 | $F_{25,497} = 0.87$ | 0.65                 | 0.86                 |

q-Values: FDR-corrected p-values. Note: The FRD correction is performed across all three genetic groups and therefore takes into account all 237 p-values shown in the table. Subscript F values represent numerator and denominator degrees of freedom, respectively. Red values are below the standard 5% alpha criteria.
